# Supplementary material
Source: HighWire-hosted journal article supplement (doi:10.1101/rna.079159.122)
Supplement: Supplemental_Legends.docx [file Supplemental_Legends.docx]

**Supplemental Figure 1** Raw count profiles of 3 additional intron lariats that are elevated in DFO treated cells. The read density fall-off at the 5′ and 3′ intron boundaries is characteristic of lariat RNA. The introns shows are *QRICH* intron 8, *CD40* intron 3, and *NELFB* intron 11.

**Supplemental Table 1** Concentrations of metal ions in water and media were measured with ICP-MS. Concentration of metals in human cervix tissue was reported in (Cunzhi et al. 2003).

**Supplemental Table 2** ICP-MS operating conditions and instrument parameters

**Supplemental Table 3** Analyte modes, calibration linearity, detection limits and recoveries on quality control (QC) standards
